# Supplementary material for: Inappropriate end-of-life cancer care in a generalist and specialist palliative care model: a nationwide retrospective population-based observational study
Source: PubMed Central journal article supplement — BMJ Support Palliat Care. 2020 Dec 22;12(e1):e137–45. doi: 10.1136/bmjspcare-2020-002302 (PMC9120402; doi:10.1136/bmjspcare-2020-002302), 2020-12-22
Supplement: bmjspcare-2020-002302supp001.pdf [file bmjspcare-2020-002302supp001.pdf]

**SUPPLEMENT TO MANUSCRIPT**

“Palliative care and the delivery of potentially inappropriate end-of-life care among patients with cancer: a nationwide retrospective population-based observational study in a mixed generalist and specialist palliative care model”

- Supplement Table 1. Vektis database - Oncology identification codes
- Supplement Table 2. Characteristics of healthcare codes for generalist and specialist palliative care across care-settings

Supplement Table1. Vektis database - Oncology identification codes

| <b>Oncology identification</b>         | <b>Specialist code</b> | <b>Diagnostic code</b> | <b>Oncology identification</b> | <b>Specialist code</b> | <b>Diagnostic code</b> | <b>Oncology identification</b>                 | <b>Specialist code</b> | <b>Diagnostic code</b> |
|----------------------------------------|------------------------|------------------------|--------------------------------|------------------------|------------------------|------------------------------------------------|------------------------|------------------------|
| <i>Cancer of breast</i>                |                        |                        |                                | 0304                   | 0221                   |                                                | 0322                   | 1305                   |
|                                        |                        |                        |                                | 0304                   | 0222                   |                                                | 0322                   | 1306                   |
|                                        |                        | 0303                   | 0318                           | 0304                   | 0223                   | <i>Cancer of breast, secondary</i>             | 0322                   | 1307                   |
|                                        |                        | 0313                   | 0811                           | 0304                   | 0224                   |                                                | 0303                   | 0314                   |
|                                        |                        | 0361                   | 0105                           | 0304                   | 0225                   |                                                | 0313                   | 0623                   |
|                                        |                        |                        |                                | 0304                   | 0226                   |                                                | 0313                   | 0624                   |
|                                        |                        |                        |                                | 0304                   | 0230                   |                                                | 0313                   | 0629                   |
| <i>Cancer of bronchus, lung</i>        |                        |                        |                                |                        |                        |                                                | 0303                   | 0358                   |
|                                        |                        | 0303                   | 0313                           | 0316                   | 6119                   |                                                | 0301                   | 0358                   |
|                                        |                        | 0313                   | 0621                           | 0303                   | 0352                   |                                                | 0302                   | 0019                   |
|                                        |                        | 0313                   | 0622                           | 0303                   | 0363                   |                                                | 0302                   | 0020                   |
|                                        |                        | 0322                   | 1303                           | 0305                   | 1150                   |                                                | 0302                   | 0021                   |
|                                        |                        | 0322                   | 1304                           | 0305                   | 1199                   |                                                | 0302                   | 0040                   |
|                                        |                        | 0328                   | 1210                           | 0316                   | 6115                   |                                                | 0302                   | 0041                   |
|                                        |                        | 0328                   | 1220                           | 0316                   | 6120                   |                                                | 0302                   | 0042                   |
|                                        |                        | 0328                   | 1230                           | 0307                   | OM17                   |                                                | 0302                   | 0060                   |
|                                        |                        | 0328                   | 1240                           | 0361                   | 0111                   |                                                | 0302                   | 0061                   |
|                                        |                        | 0328                   | 1250                           | 0313                   | 0899                   |                                                | 0302                   | 0062                   |
|                                        |                        | 0328                   | 1270                           | 0303                   | 0359                   | <i>Cancer, other &amp; unspecified primary</i> | 0302                   | 0063                   |
|                                        |                        | 0328                   | 1310                           | 0318                   | 0906                   |                                                | 0302                   | 0064                   |
|                                        |                        | 0328                   | 1340                           | 0335                   | 0211                   | <i>Cancer of Head &amp; Neck</i>               | 0302                   | 0065                   |
|                                        |                        | 0328                   | 1430                           | 0361                   | 0109                   |                                                | 0302                   | 0066                   |
|                                        |                        | 0328                   | 1440                           | 0389                   | 0100                   |                                                | 0302                   | 0067                   |
|                                        |                        | 0328                   | 1460                           | 0308                   | 1145                   |                                                | 0302                   | 0068                   |
|                                        |                        | 0328                   | 1470                           | 0308                   | 1150                   |                                                | 0302                   | 0069                   |
|                                        |                        | 0328                   | 1510                           | 0313                   | 0243                   |                                                | 0302                   | 0072                   |
|                                        |                        | 0328                   | 1530                           | 0313                   | 0263                   |                                                | 0302                   | 0084                   |
|                                        | 0328                   | 1595                   | 0313                           | 0264                   |                        | 0303                                           | 0306                   |                        |
|                                        | 0328                   | 1420                   | 0303                           | 0301                   |                        | 0303                                           | 0354                   |                        |
|                                        | 0361                   | 0103                   |                                |                        |                        | 0313                                           | 0801                   |                        |
|                                        |                        |                        |                                |                        |                        | 0361                                           | 0101                   |                        |
| <i>Cancer of liver &amp; bile duct</i> |                        |                        |                                | 0303                   | 0333                   |                                                | 0303                   | 0357                   |
|                                        |                        | 0303                   | 0367                           | 0303                   | 0347                   | <i>Cancer of other GI organs, peritoneum</i>   | 0303                   | 0331                   |
|                                        |                        | 0313                   | 0955                           | 0313                   | 0927                   |                                                | 0318                   | 0810                   |
|                                        |                        | 0316                   | 6118                           | 0318                   | 0607                   |                                                | 0361                   | 0102                   |
|                                        |                        | 0318                   | 0712                           | 0318                   | 0610                   |                                                | 0303                   | 0349                   |
|                                        | 0318                   | 0735                   |                                |                        |                        | 0313                                           | 0979                   |                        |
|                                        | 0303                   | 0348                   |                                |                        |                        |                                                |                        |                        |
| <i>Cancer of stomach</i>               |                        |                        |                                | 0303                   | 0319                   |                                                | 0303                   | 0332                   |
|                                        |                        | 0303                   | 0346                           | 0313                   | 0904                   | <i>Cancer of pancreas</i>                      | 0313                   | 0964                   |
|                                        |                        | 0313                   | 0914                           | 0318                   | 0307                   |                                                | 0318                   | 0755                   |
|                                        | 0318                   | 0407                   |                                |                        |                        |                                                |                        |                        |

Supplement Table1. Vektis database - Oncology identification codes (continued)

| <b>Oncology identification</b>                      | <b>Specialist code</b> | <b>Diagnostic code</b> | <b>Oncology identification</b>              | <b>Specialist code</b> | <b>Diagnostic code</b> | <b>Oncology identification</b>                       | <b>Specialist code</b> | <b>Diagnostic code</b> |
|-----------------------------------------------------|------------------------|------------------------|---------------------------------------------|------------------------|------------------------|------------------------------------------------------|------------------------|------------------------|
| <i>Cancer of rectum &amp; anus</i>                  | 0303                   | 0334                   | <i>Cancer of thyroid</i>                    | 0303                   | 0303                   | <i>Melanoma</i>                                      | 0302                   | 0001                   |
|                                                     | 0303                   | 0335                   |                                             | 0313                   | 0214                   |                                                      | 0303                   | 0350                   |
|                                                     |                        |                        |                                             | 0313                   | 0291                   |                                                      | 0313                   | 0842                   |
| <i>Cancer of female genital organs</i>              | 0307                   | 0M13                   | <i>Cancer of brain &amp; nervous system</i> | 0330                   | 9921                   | <i>Cancer of brain &amp; nervous system (cont'd)</i> | 0316                   | 3505                   |
|                                                     | 0313                   | 0822                   |                                             | 0304                   | 0353                   |                                                      | 0316                   | 6113                   |
|                                                     | 0307                   | 0M14                   |                                             | 0308                   | 1101                   |                                                      | 0327                   | 0316                   |
|                                                     | 0307                   | 0M15                   |                                             | 0308                   | 1105                   |                                                      | 0330                   | 0201                   |
|                                                     | 0307                   | 0M16                   |                                             | 0308                   | 1110                   |                                                      | 0330                   | 0202                   |
|                                                     | 0307                   | 0M99                   |                                             | 0308                   | 1115                   |                                                      | 0330                   | 0204                   |
|                                                     | 0307                   | 0M11                   |                                             | 0308                   | 1120                   |                                                      | 0330                   | 0211                   |
|                                                     | 0307                   | 0M12                   |                                             | 0308                   | 1125                   |                                                      | 0330                   | 0212                   |
|                                                     | 0313                   | 0821                   |                                             | 0308                   | 1130                   |                                                      | 0330                   | 0213                   |
|                                                     | 0313                   | 0823                   |                                             | 0308                   | 1135                   |                                                      | 0330                   | 0221                   |
|                                                     | 0361                   | 0106                   |                                             | 0308                   | 1140                   |                                                      | 0330                   | 0222                   |
|                                                     |                        |                        |                                             | 0308                   | 1810                   |                                                      | 0330                   | 0223                   |
|                                                     |                        |                        |                                             | 0308                   | 2101                   |                                                      | 0330                   | 0231                   |
|                                                     |                        |                        |                                             | 0308                   | 2105                   |                                                      | 0330                   | 0232                   |
| <i>Cancer of male genital organs &amp; prostate</i> | 0306                   | 0050                   | 0308                                        | 2110                   | 0330                   | 0233                                                 |                        |                        |
|                                                     | 0306                   | 0060                   | 0308                                        | 2115                   | 0330                   | 0241                                                 |                        |                        |
|                                                     | 0306                   | 0069                   | 0308                                        | 2120                   | 0330                   | 0242                                                 |                        |                        |
|                                                     | 0306                   | 0092                   | 0308                                        | 2125                   | 0330                   | 0243                                                 |                        |                        |
|                                                     | 0313                   | 0831                   | 0308                                        | 2130                   | 0330                   | 0251                                                 |                        |                        |
|                                                     | 0306                   | 0040                   | 0308                                        | 3101                   | 0330                   | 0299                                                 |                        |                        |
|                                                     | 0306                   | 0045                   | 0313                                        | 0802                   | 0361                   | 0108                                                 |                        |                        |
|                                                     | 0306                   | 0048                   |                                             |                        |                        |                                                      |                        |                        |
|                                                     | 0313                   | 0832                   |                                             |                        |                        |                                                      |                        |                        |
|                                                     | 0361                   | 0107                   |                                             |                        |                        |                                                      |                        |                        |
| <i>Cancer of bone &amp; connective tissue</i>       | 0305                   | 1140                   | <i>Cancer of kidney &amp; renal pelvis</i>  | 0306                   | 0025                   | <i>Cancer of other urinary organs</i>                | 0306                   | 0020                   |
|                                                     | 0313                   | 0841                   |                                             | 0303                   | 0370                   |                                                      | 0306                   | 0070                   |
|                                                     | 0313                   | 0843                   |                                             | 0306                   | 0010                   |                                                      | 0306                   | 0078                   |
|                                                     | 0316                   | 6107                   |                                             | 0306                   | 0016                   |                                                      | 0313                   | 0833                   |
|                                                     | 0361                   | 0104                   |                                             | 0313                   | 0834                   |                                                      | 0313                   | 0839                   |
| <i>Cancer of bladder</i>                            |                        |                        | <i>Secondary malignancies</i>               | 0316                   | 6116                   | <i>Other oncological diseases</i>                    |                        |                        |
|                                                     | 0306                   | 0030                   |                                             | 0303                   | 0360                   |                                                      |                        |                        |
|                                                     | 0306                   | 0084                   |                                             | 0305                   | 1110                   |                                                      | 8418                   | 0513                   |
|                                                     |                        |                        |                                             | 0322                   | 1308                   |                                                      |                        |                        |
|                                                     |                        |                        | 0330                                        | 0203                   |                        |                                                      |                        |                        |
| <i>Pain, due to malignancy</i>                      | 0324                   | 0715                   |                                             |                        |                        |                                                      |                        |                        |

Supplement Table 2. Characteristics of healthcare codes for generalist and specialist palliative care across care-settings

| <b>Reimbursement code</b>                                                             | <b>Type of care</b>        | <b>Billable for</b>               | <b>Billable timeframe</b>     | <b>Location of care</b> |
|---------------------------------------------------------------------------------------|----------------------------|-----------------------------------|-------------------------------|-------------------------|
| <i>Weighing treatment options in light of advance care planning</i>                   | Generalist palliative care | MO <sup>a</sup> / NP <sup>b</sup> | Throughout disease trajectory | Hospital                |
| <i>Supportive care/ palliative care in oncology setting</i>                           | Generalist palliative care | MO <sup>a</sup> / NP <sup>b</sup> | Throughout disease trajectory | Hospital                |
| <i>Interdisciplinary palliative care team</i>                                         | Specialist palliative care | Multidisciplinary                 | Throughout disease trajectory | Hospital                |
| <i>Intensive home / hospice care*</i>                                                 | Generalist palliative care | Family physician                  | Prognosis < 3 months          | Home / Hospice          |
| <i>Multidisciplinary meeting with primary and specialty palliative care providers</i> | Specialist palliative care | Family physician                  | Throughout disease trajectory | Home / Hospice          |
| <i>Bed-side palliative care consultation</i>                                          | Specialist palliative care | Family physician                  | Prognosis < 3 months          | Home / Hospice          |
| <i>Hospice care at home</i>                                                           | Generalist palliative care | Nurse                             | Prognosis < 3 months          | Home                    |
| <i>Community hospice care</i>                                                         | Generalist palliative care | Nurse                             | Prognosis < 3 months          | Hospice                 |
| <i>Intensive long term care*</i>                                                      | Generalist palliative care | Physician / Nurse                 | Prognosis < 3 months          | Nursing home            |
| <i>Intensive long term care at home*</i>                                              | Generalist palliative care | Physician / Nurse                 | Prognosis < 3 months          | Home                    |
| <i>Palliative care unit</i>                                                           | Generalist palliative care | Multidisciplinary                 | Prognosis < 3 months          | Nursing home            |

<sup>a</sup> MO; medical oncologist. <sup>b</sup> NP; nurse practitioner. \* This reimbursement code refers to intensification of care for chronically or seriously ill patients in the last phase of their life.
